# Supplementary material for: Casiopeinas® third generation, with indomethacin: synthesis, characterization, DFT studies, antiproliferative activity, and nanoencapsulation
Source: Royal Society of Chemistry journal article supplement (doi:10.1039/d2ra03346a), 2022-01-01
Supplement: d2ra03346a1.pdf [file d2ra03346a1.pdf]

## Casiopinas® with Indomethacin: Synthesis, characterization, DFT studies, antiproliferative activity, and nanoencapsulation

Yokari Godínez-Loyola<sup>1</sup>, Jesús Gracia-Mora<sup>1</sup>, Iván Darío Rojas-Montoya<sup>1</sup>, Luis Felipe Hernández-Ayala<sup>1</sup>, Miguel Reina<sup>1</sup>, Luis Antonio Ortiz-Frade<sup>2</sup>, Ramón Enrique Robles-Zepeda<sup>3</sup>, María Josefa Bernad-Bernad\*<sup>1</sup> and Lena Ruiz-Azuara\*<sup>1</sup>

### Supporting Information

| Index                                                                                                                                                                                                                       |       |
|-----------------------------------------------------------------------------------------------------------------------------------------------------------------------------------------------------------------------------|-------|
| Content                                                                                                                                                                                                                     | Page  |
| Section S1. [Cu(N-N)(Indo)(H <sub>2</sub> O)]NO <sub>3</sub> complexes. Synthesis and physicochemical characterization.                                                                                                     | 2     |
| Figure S1. FT-IR spectra of the coordination compounds.                                                                                                                                                                     | 4-6   |
| Figure S2. APSI(Appearance Potential Soft Ionization) Mass Spectra in methanol                                                                                                                                              | 7-9   |
| Table S1. <i>g</i> factor values (isotropic, parallel and perpendicular components), A constant coupling (isotropic, parallel and perpendicular components for Cu interactions and nitrogen interaction ( <sup>A</sup> N)). | 9     |
| Figure S3. Experimental and simulated EPR spectra. 3 mmol/L MeOH solutions at 77 K.                                                                                                                                         | 10-13 |
| Figure S4. Electronic spectra at different pHs aqua(4,7-dimethyl-1,10-phenanthroline)(Indo)copper(II) nitrate (1b) at 37 °C using methanol solutions at 0.001 M.                                                            | 13    |
| Figure S5. Electronic spectra at different times of aqua(4,7-dimethyl-1,10-phenanthroline)(Indo)copper(II) nitrate (1b) using methanol solutions at 0.001 M.                                                                | 14    |
| Figure S6. Electronic spectra at different temperatures of the compound aqua(4,7-dimethyl-1,10-phenanthroline)(Indo)copper(II) nitrate (1b) using methanol solutions at 0.001 M.                                            | 14    |
| Figure S7. Optimized (M06/LanL2DZ) geometries, calculated <i>V<sub>M</sub></i> and <i>E<sup>0</sup></i> for [Cu(Indo)(N-N)] <sup>+</sup> complexes.                                                                         | 15    |
| Figure S8. Plot of estimated and calculated redox potential                                                                                                                                                                 | 16    |
| Figure S9. Differential calorimetry screening plot for PNIPAAm and nanogel (pH= 5.0 and 7.4)                                                                                                                                | 16    |
| Table S2. Encapsulation experiments data                                                                                                                                                                                    | 17    |
| Figure S7. Release compound percentage and Peppas-Sahlin model adjustment                                                                                                                                                   | 17    |

\* Corresponding author: [bernadf@comunidad.unam.mx](mailto:bernadf@comunidad.unam.mx) and [lenar701@gmail.com](mailto:lenar701@gmail.com)

### ***51. Synthesis and physicochemical characterization of [Cu(N-N)(Indo)(H<sub>2</sub>O)]NO<sub>3</sub>***

All coordination compounds were synthesized as described in Scheme 1(a), starting from Cu(NO<sub>3</sub>)<sub>2</sub>•2.5H<sub>2</sub>O, with a ratio 1:1:1 Cu-HIndo-diimine in a MeOH/H<sub>2</sub>O at 3:1 ratio solution in the presence of a base. Green powders were obtained after 2 hours of reaction, solvent partial evaporation, and recrystallization with a mix EtOH/diethyl ether.

*Aqua(1,10-phenanthroline)(Indo)copper(II) nitrate (1a).* Elemental analysis for [C<sub>31</sub>H<sub>23</sub>N<sub>4</sub>O<sub>7</sub>CuCl(C<sub>4</sub>H<sub>10</sub>)<sub>2.5</sub>] (MW = 847.58 g/mol); calculated: %C 56.86, %N 8.03, %H 3.90; found: %C 56.49, %N 8.45, %H 3.49. Yield 0.78 g (78 %). APSI-MS in methanol: 620.1013, found X 620.925 [M<sup>+</sup>]. FTIR v/cm<sup>-1</sup>: 2928 v(CH<sub>3</sub>), 1429 δ(CH<sub>3</sub>), 1673 v<sub>asym</sub>(C=O), 1589 y 1520 v(C=N/C=C), 1217 v(C-O), 849 and 721 δ(C-H out of the plane), 1385 v(NO<sub>3</sub>) and 3392 v(O-H). μ<sub>eff</sub> = 1.66 MB. J<sub>M</sub> = 91.3 Ohm<sup>-1</sup> cm<sup>2</sup> mol<sup>-1</sup>. UV-Vis(MeOH): λ<sub>max</sub> nm (ε M<sup>-1</sup> cm<sup>-1</sup>): 222 (9035), 272 (6404), 298 (3010), 653 (22), 758 (15).

*Aqua(4,7-dimethyl-1,10-phenanthroline)(Indo)copper(II) nitrate (1b).* Elemental analysis for the green powder [C<sub>33</sub>H<sub>29</sub>N<sub>4</sub>O<sub>8</sub>ClCu(H<sub>2</sub>O)<sub>0.5</sub>] (717.60 g/mol); calculated: %C 55.23, %N 7.80, %H 4.21; found: %C 55.23, %N 8.07, %H 3.92. Yield 0.74 g (76 %). APSI-MS in methanol: 669.1068, found 669.1045, [M<sup>+</sup>]. FTIR v/cm<sup>-1</sup>: 2926 v(CH<sub>3</sub>), 1425 δ(CH<sub>3</sub>), 1622 v<sub>asym</sub>(C=O), 1564 and 1524 v(C=N/C=C), 1215 v(C-O), 868 and 723 δ(C-H out of the plane), 1383 v(NO<sub>3</sub>) and 3400 v(O-H). μ<sub>eff</sub> = 2.21 MB. J<sub>M</sub> = 105.9 Ohm<sup>-1</sup> cm<sup>2</sup> mol<sup>-1</sup>. UV-Vis(MeOH): λ<sub>max</sub> nm (ε M<sup>-1</sup> cm<sup>-1</sup>): 234 (9837), 272 (12364), 295 (4209), 633 (28) and 754 (14).

*Aqua(5,6-dimethyl-1,10-phenanthroline)(Indo)copper(II) nitrate (1c).* Elemental analysis for the green powder [C<sub>33</sub>H<sub>27</sub>N<sub>4</sub>O<sub>7</sub>ClCu(H<sub>2</sub>O)<sub>0.5</sub>] (699.58 g/mol); calculated: %C 56.65, %N 8.00, %H 4.03; found: %C 56.49, %N 8.40, %H 3.97. Yield 0.65 g (67 %). APSI-MS in methanol: 647.124824, found 647.1244 [M<sup>+</sup>]. FTIR v/cm<sup>-1</sup>: 2943 v(CH<sub>3</sub>), 1433 δ(CH<sub>3</sub>), 1606 v<sub>asym</sub>(C=O), 1587 and 1524 v(C=N/C=C), 1215 v(C-O), 812 and 727 δ(C-H out of the plane), 1385 v(NO<sub>3</sub>) and 3394 v(O-H). μ<sub>eff</sub> = 1.98 MB. J<sub>M</sub> = 93.1 Ohm<sup>-1</sup> cm<sup>2</sup> mol<sup>-1</sup>. UV-Vis(MeOH): λ<sub>max</sub> nm (ε M<sup>-1</sup> cm<sup>-1</sup>): 235 (9439), 280 (11285), 301 (4545), 643 (36) and 763 (29).

*Aqua(3,4,7,8-tetramethyl-1,10-phenanthroline)(Indo)copper(II) nitrate (1d)*. Elemental analysis for the green powder [ $C_{35}H_{37}N_4O_{10}ClCu(H_2O)_2$ ] (772.68 g/mol); calculated: %C 54.40, %N 7.55, %H 4.82; found: %C 54.38, %N 7.55, %H 4.54. Yield 0.48 g (49 %). APSI-MS in methanol: 657.1456, found 657.1431,  $[M^+]$ . FTIR  $\nu/cm^{-1}$ : 2926  $\nu(CH_3)$ , 1431  $\delta(CH_3)$ , 1618  $\nu(C=O)$ , 1593 and 1531  $\nu(C=N/C=C)$ , 1217  $\nu(C-O)$ , 835 and 721  $\delta(C-H \text{ out of the plane})$ , 1385  $\nu(NO_3)$  and 3417  $\nu(O-H)$ .  $\mu_{eff} = 1.96$  MB.  $\Lambda_M = 89.5 \text{ Ohm}^{-1} \text{ cm}^2 \text{ mol}^{-1}$ . UV-Vis(MeOH):  $\lambda_{max}$  nm ( $\epsilon \text{ M}^{-1} \text{ cm}^{-1}$ ): 234 (9924), 278 (11420), 302 (4446), 632 (51) and 756 (25).

*Aqua(2,2'-bipyridine)(Indo)copper(II) nitrate (2a)*. A green solid was obtained after solvent evaporation and recrystallization on EtOH/diethyl ether. Elemental analysis for [ $C_{29}H_{25}N_4O_8ClCu(H_2O)_{1.5}$ ] (683.54 g/mol); calculated: %C 50.95, %N 8.19, %H 4.12; found: %C 50.48, %N 8.36, %H 4.00. Yield 0.89 g (88 %). APSI-MS in methanol: 579.0986, found 579.0235X  $[M^+]$ . FTIR  $\nu/cm^{-1}$ : 2939  $\nu(CH_3)$ , 1446  $\delta(CH_3)$ , 1603  $\nu_{asym}(C=O)$ , 1579 and 1564  $\nu(C=N/C=C)$ , 1215  $\nu(C-O)$ , 769  $\nu \delta(C-H \text{ out of the plane})$ , 1385  $\nu(NO_3)$  and 3406  $\nu(O-H)$ .  $\mu_{eff} = 2.20$  MB.  $\Lambda_M = 102.9 \text{ Ohm}^{-1} \text{ cm}^2 \text{ mol}^{-1}$ . UV-Vis(MeOH):  $\lambda_{max}$  nm ( $\epsilon \text{ M}^{-1} \text{ cm}^{-1}$ ): 236 (7787), 297 (7233), 308 (5882), 638 (33) and 768 ( $\epsilon$  17).

*Aqua(4,4'-dimethyl-2,2'-bipyridine)(Indo)copper(II) nitrate (2b)*. Elemental analysis for green powder [ $C_{31}H_{27}N_4O_7CuCl(0.5C_4H_{10}O)$ ] (709.63 g/mol), calculated: %C 56.32, %N 7.96, %H 4.58; found: %C 56.51, %N 7.96, %H 4.31. Yield 0.72 g (72 %). APSI-MS in methanol: 607.1299, found 607.1290X,  $[M^+]$ . FTIR  $\nu/cm^{-1}$ : 2928  $\nu(CH_3)$ , 1477  $\delta(CH_3)$ , 1616  $\nu_{asym}(C=O)$ , 1597 and 1570  $\nu(C=N/C=C)$ , 1225  $\nu(C-O)$ , 754  $\delta(C-H \text{ out of the plane})$ , 1385  $\nu(NO_3)$  and 3431  $\nu(O-H)$ .  $\mu_{eff} = 1.78$  MB.  $\Lambda_M = 90.5 \text{ Ohm}^{-1} \text{ cm}^2 \text{ mol}^{-1}$ . UV-Vis(MeOH):  $\lambda_{max}$  nm ( $\epsilon \text{ M}^{-1} \text{ cm}^{-1}$ ): 236 (9924), 294 (6289), 305 (5872), 633 (35) and 763 (18).

*Aqua(5,5'-dimethyl-2,2'-bipyridine)(Indo)copper(II) nitrate (2c)*. Elemental analysis for green powder [ $C_{31}H_{29}N_4O_8CuCl(H_2O)_2$ ] (720.61 g/mol); calculated: %C 51.66, %N 7.77, %H 4.54; found: %C 51.61, %N 8.07, %H 4.54. Yield 0.76 g (75 %). APSI-MS in methanol: 607.1299, found 607.1230  $[M^+]$ . FTIR  $\nu/cm^{-1}$ : 2924  $\nu(CH_3)$ , 1481  $\delta(CH_3)$ , 16160  $\nu_{asym}(C=O)$ ,

1591 and 1568  $\nu(\text{C}=\text{N}/\text{C}=\text{C})$ , 1217  $\nu(\text{C}-\text{O})$ , 727  $\delta(\text{C}-\text{H}$  out of the plane), 1385  $\nu(\text{NO}_3)$  and 3396  $\nu(\text{O}-\text{H})$ .  $\mu_{\text{eff}} = 1.92$  MB.  $J_M = 90.5 \text{ Ohm}^{-1} \text{ cm}^2 \text{ mol}^{-1}$ . UV-Vis(MeOH):  $\lambda_{\text{max}}$  nm ( $\epsilon \text{ M}^{-1} \text{ cm}^{-1}$ ): 235 (9931), 307 (8377), 319 (6586), 656 (45) and 788 (24).

*Aqua(1,10-phenanthroline)(Indo)copper(II)nitrate (1a).*

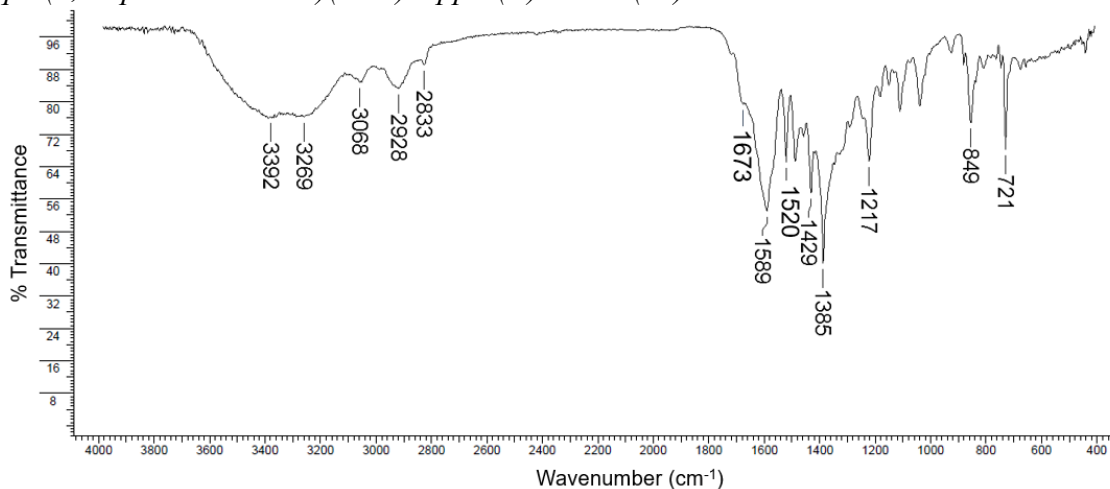

*Aqua(4,7-dimethyl-1,10-phenanthroline)(Indo)copper(II) nitrate (1b).*

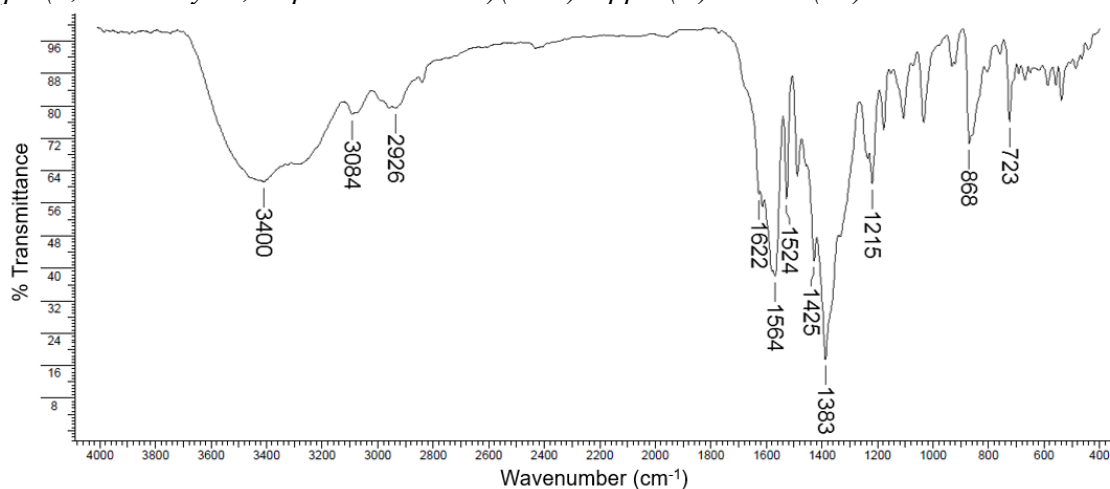

*Aqua(5,6-dimethyl-1,10-phenanthroline)(Indo)copper(II) nitrate (1c).*

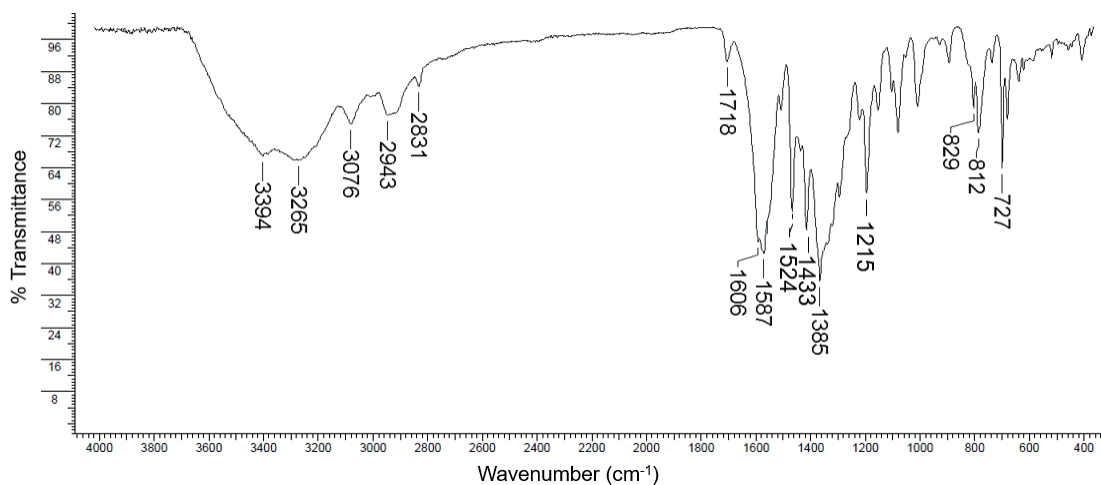

*Aqua(3,4,7,8-tetramethyl-1,10-phenanthroline)(Indo)copper(II) nitrate (1d).*

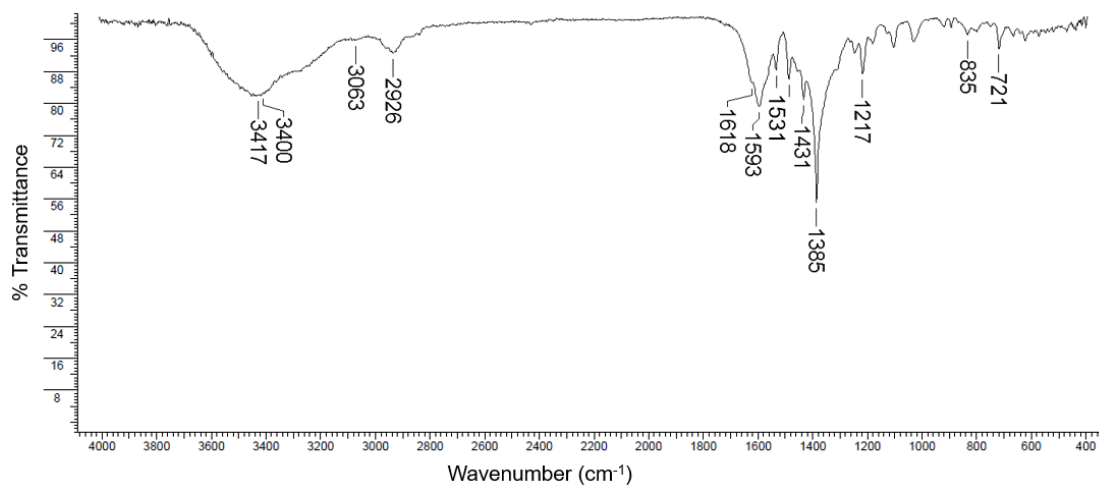

*Aqua(2,2'-bipyridine)(Indo)copper(II) nitrate (2a).*

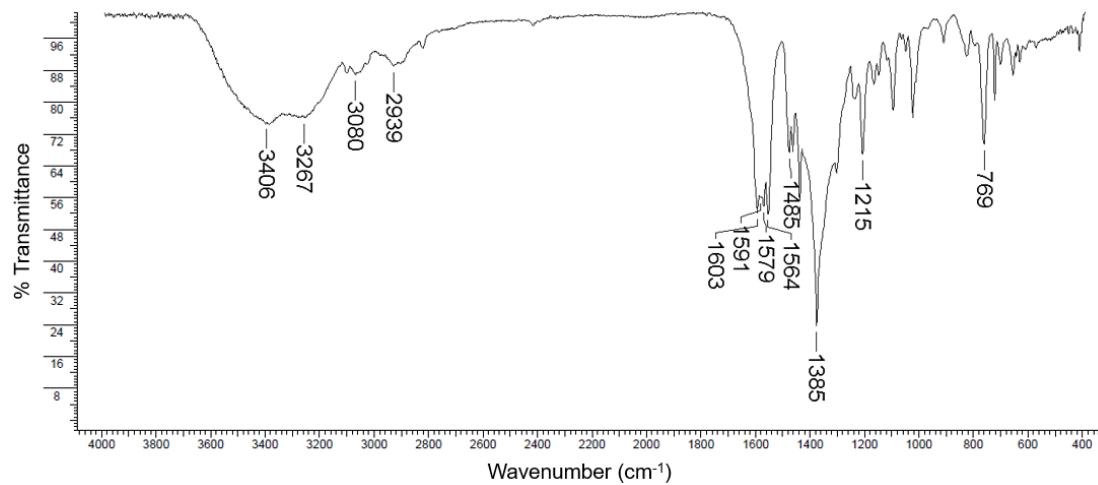

*Aqua(4,4'-dimethyl-2,2'-bipyridine)(Indo)copper(II) nitrate (2b).*

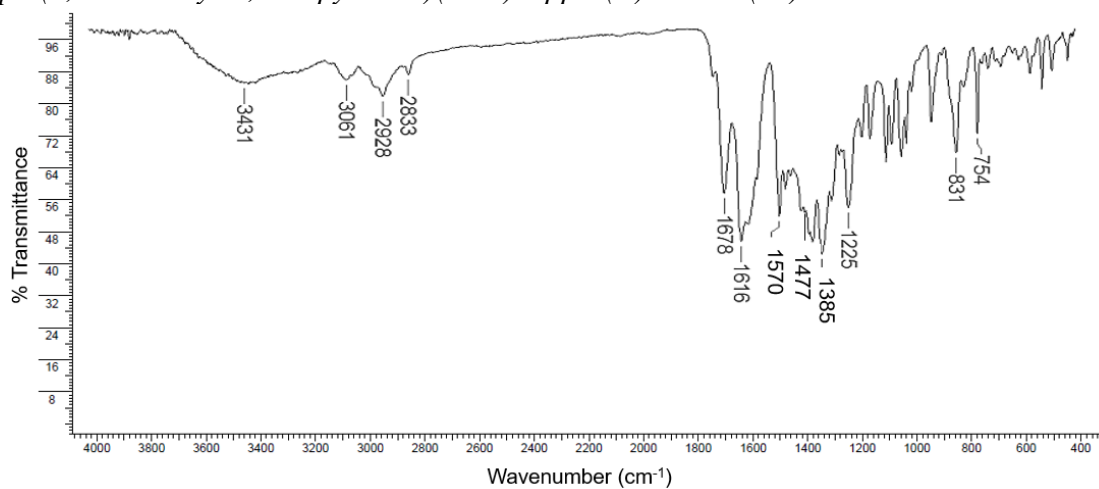

*Aqua(5,5'-dimethyl-2,2'-bipyridine)(Indo)copper(II) nitrate (2c).*

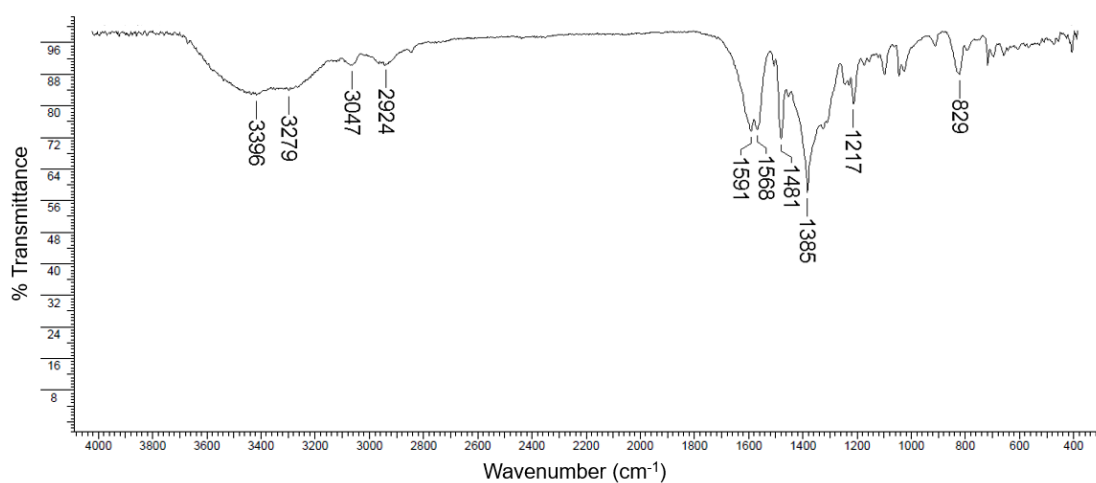

**Figure S1.** FT-IR spectra of the coordination compounds. All spectra were recorded on KBr disks in a Nexus Thermo Nicolet spectrophotometer in the range 4000 - 400 cm<sup>-1</sup>.

*Aqua(1,10-phenanthroline)(Indo)copper(II)nitrate (1a)*.  $C_{31}H_{23}N_4O_7Cu$ : 661.055, found 661.122 [ $M^+$ ].

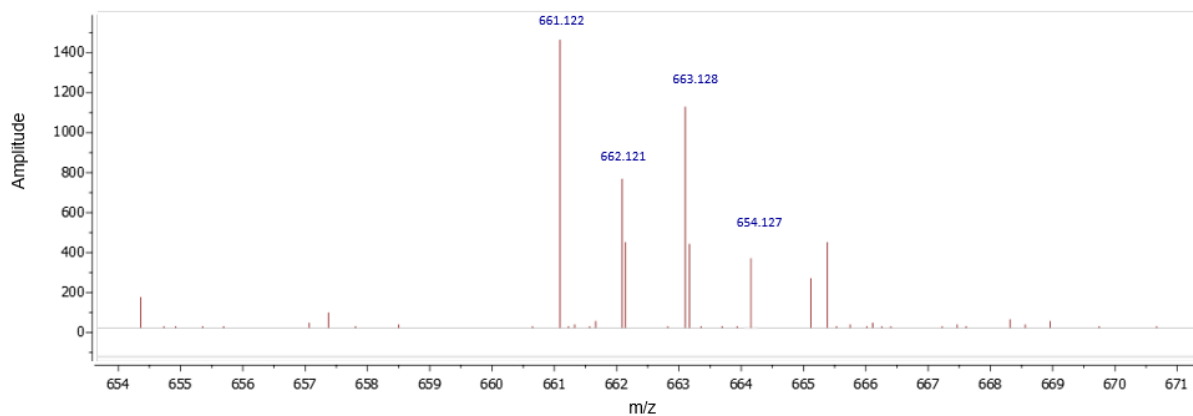

*Aqua(4,7-dimethyl-1,10-phenanthroline)(Indo)copper(II) nitrate (1b)*.  $C_{33}H_{27}N_3O_4CuCl(H_2O)$ : 684.073, found 684.193 [ $M^+$ ].

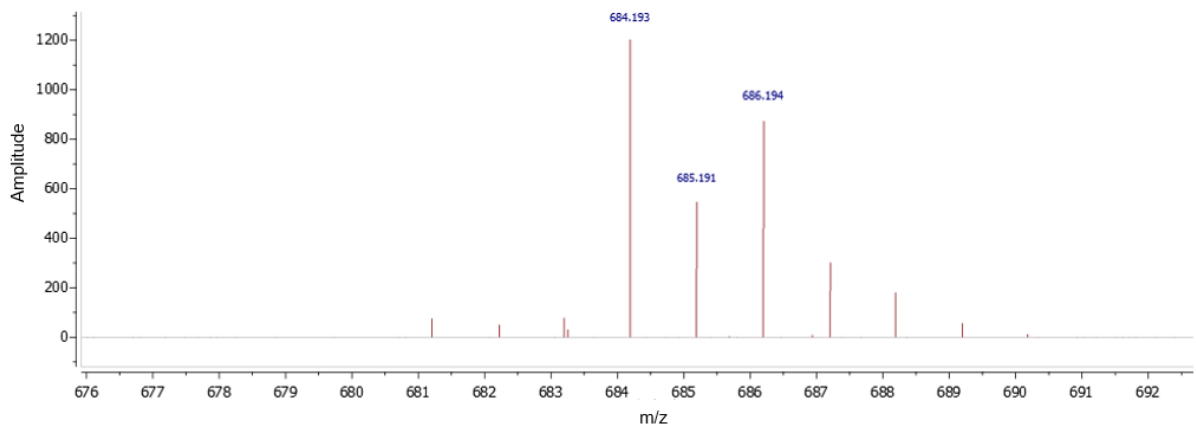

*Aqua(5,6-dimethyl-1,10-phenanthroline)(Indo)copper(II) nitrate (1c)*.  $C_{33}H_{28}N_3O_4Cu$ : 651.096, found 651.136 [ $M^+$ ].

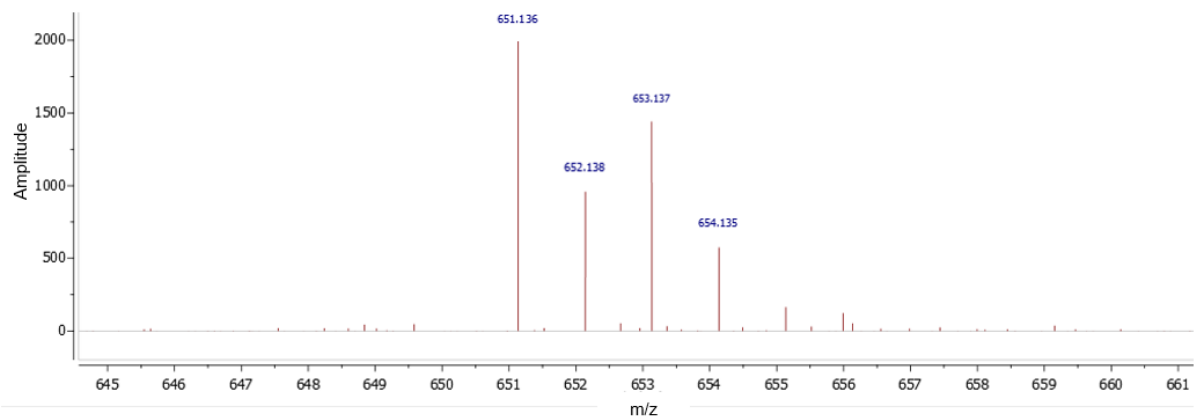

*Aqua(3,4,7,8-tetramethyl-1,10-phenanthroline)(Indo)copper(II) nitrate (1d).*

$C_{35}H_{32}N_4O_7Cu$ : 741.115, found 741.192 [ $M^+$ ].

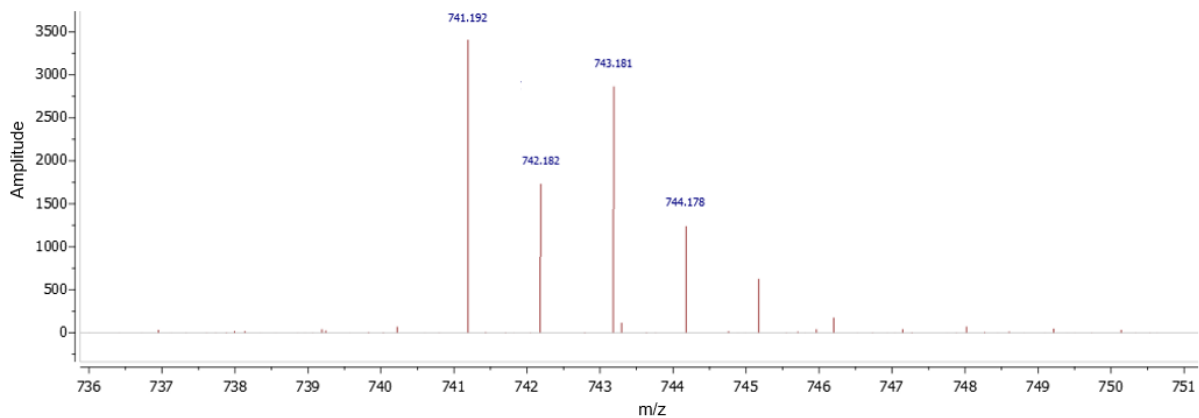

*Aqua(2,2'-bipyridine)(Indo)copper(II) nitrate (2a).*  $C_{29}H_{25}N_3O_4Cu$ : 577.083, found 577.121

[ $M^+$ ].

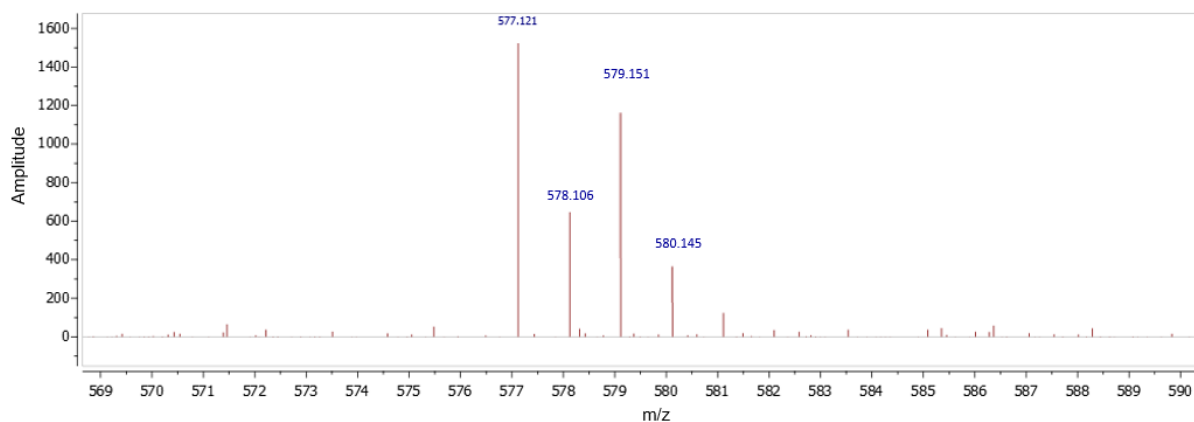

*Aqua(4,4'-dimethyl-2,2'-bipyridine)(Indo)copper(II) nitrate (2b).* APSI-MS in methanol,

$C_{31}H_{27}N_3O_4Cu$ : 603.099, found 603.521 [ $M^+$ ].

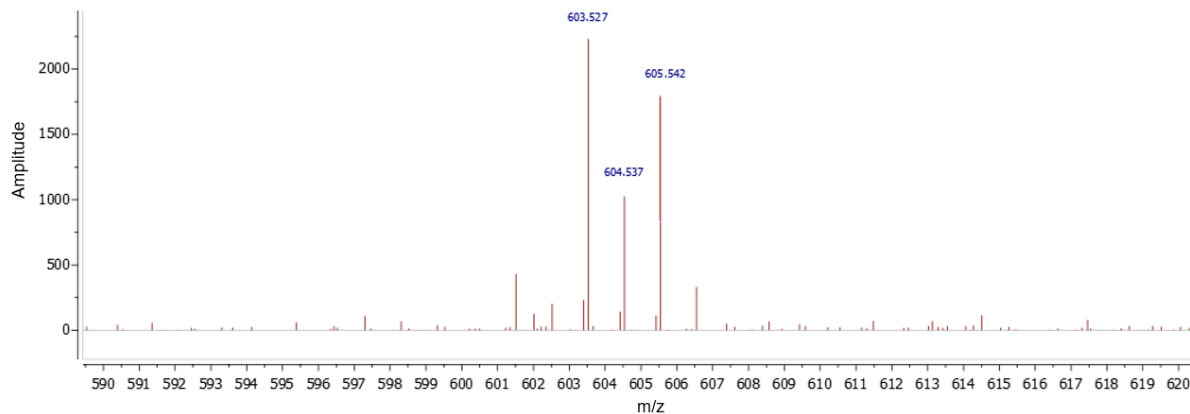



*Aqua(5,5'-dimethyl-2,2'-bipyridine)(Indo)copper(II) nitrate (2c)*.  $C_{31}H_{29}N_4O_7CuCl$ :  
667.102, found 607.149[M<sup>+</sup>].

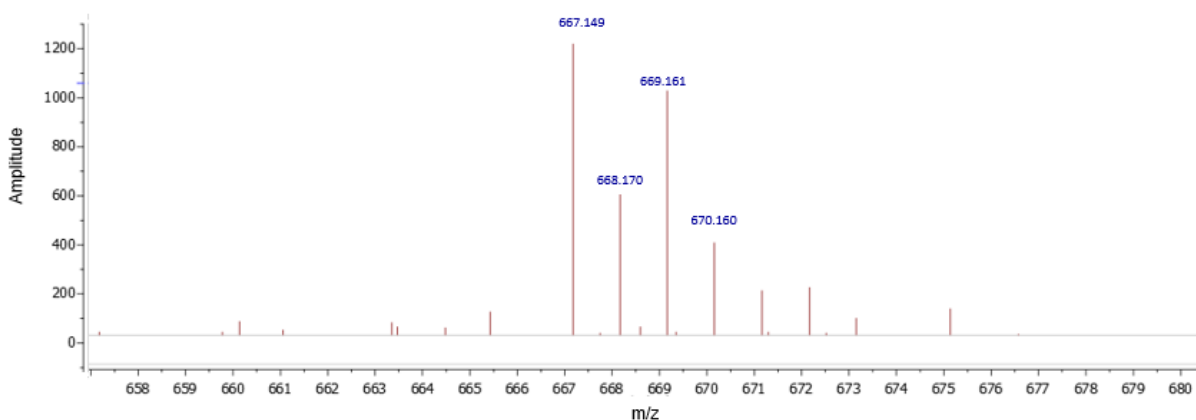

**Figure S2.** APSI(Appearance Potential Soft Ionization) Mass Spectra in methanol

**Table S1.**  $g$  factor values (isotropic, parallel and perpendicular components), A constant coupling (isotropic, parallel and perpendicular components for Cu interactions and nitrogen interaction ( $A_N$ )).

| Compound | $g_{//}$ | $g_{\perp}$ | $A_{//}^{(a)}$ | $A_{\perp}^{(a)}$ | $g_{iso}$ | $A_{iso}^{(a)}$ | $A_N^{(a)}$ | $f^{(b)}$ |
|----------|----------|-------------|----------------|-------------------|-----------|-----------------|-------------|-----------|
| 1a       | 2.276    | 2.057       | 180.852        | 14.405            | 2.130     | 66.361          | 0.0014      | 126       |
| 1b       | 2.270    | 2.057       | 182.558        | 13.757            | 2.128     | 66.534          | 0.0014      | 124       |
| 1c       | 2.270    | 2.057       | 180.428        | 14.232            | 2.128     | 66.196          | 0.0013      | 126       |
| 1d       | 2.258    | 2.054       | 189.689        | 15.957            | 2.122     | 70.411          | 0.0013      | 119       |
| 2a       | 2.265    | 2.056       | 185.593        | 15.896            | 2.126     | 69.015          | 0.0013      | 122       |
| 2b       | 2.274    | 2.056       | 181.808        | 14.916            | 2.129     | 67.025          | 0.0007      | 125       |
| 2c       | 2.262    | 2.055       | 188.970        | 16.310            | 2.124     | 70.386          | 0.0013      | 120       |

*Aqua(1,10-phenanthroline)(Indo)copper(II)nitrate (1a).*

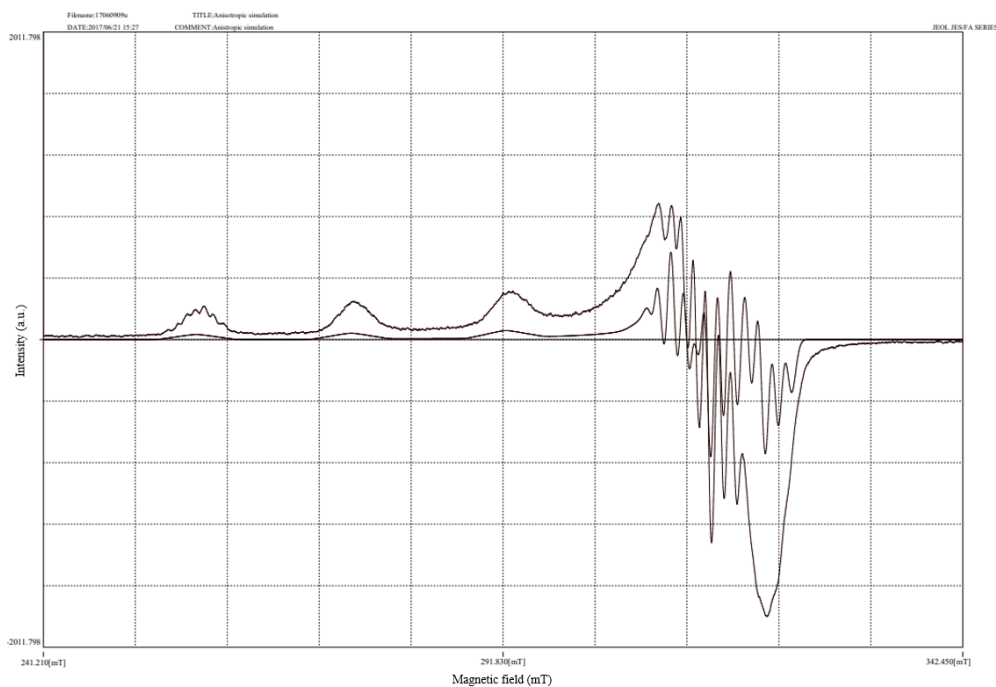

*Aqua(4,7-dimethyl-1,10-phenanthroline)(Indo)copper(II) nitrate (1b).*

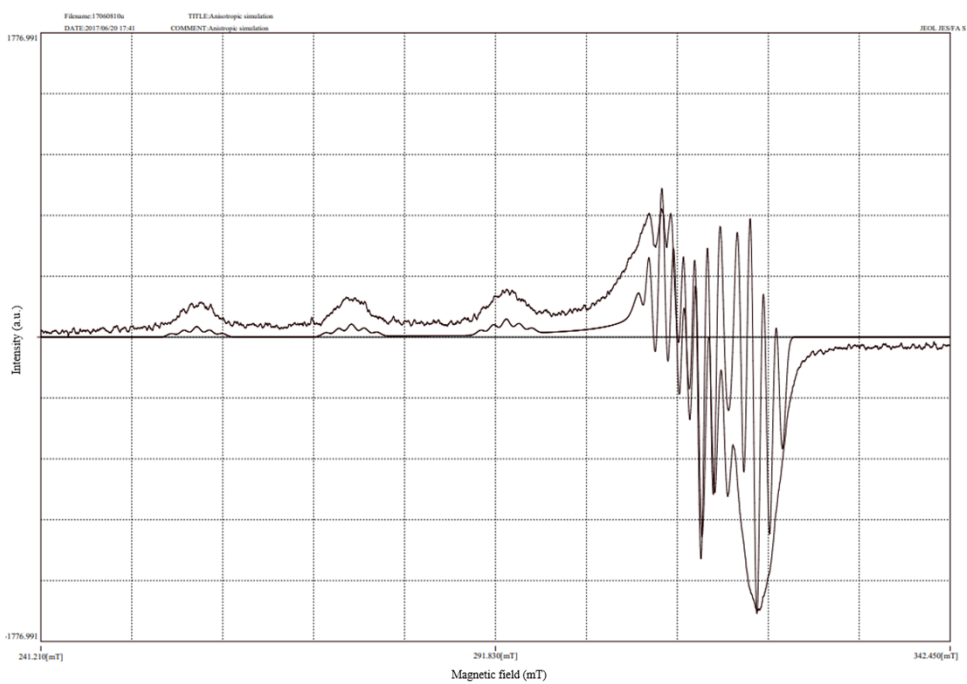

*Aqua(5,6-dimethyl-1,10-phenanthroline)(Indo)copper(II) nitrate (1c).*

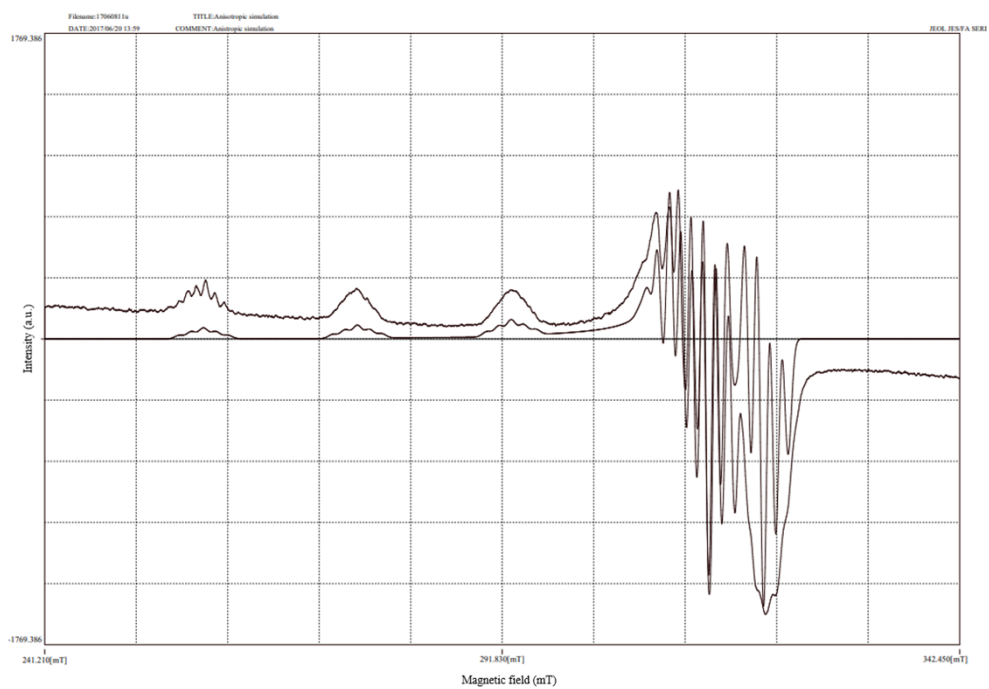

*Aqua(3,4,7,8-tetramethyl-1,10-phenanthroline)(Indo)copper(II) nitrate (1d).*

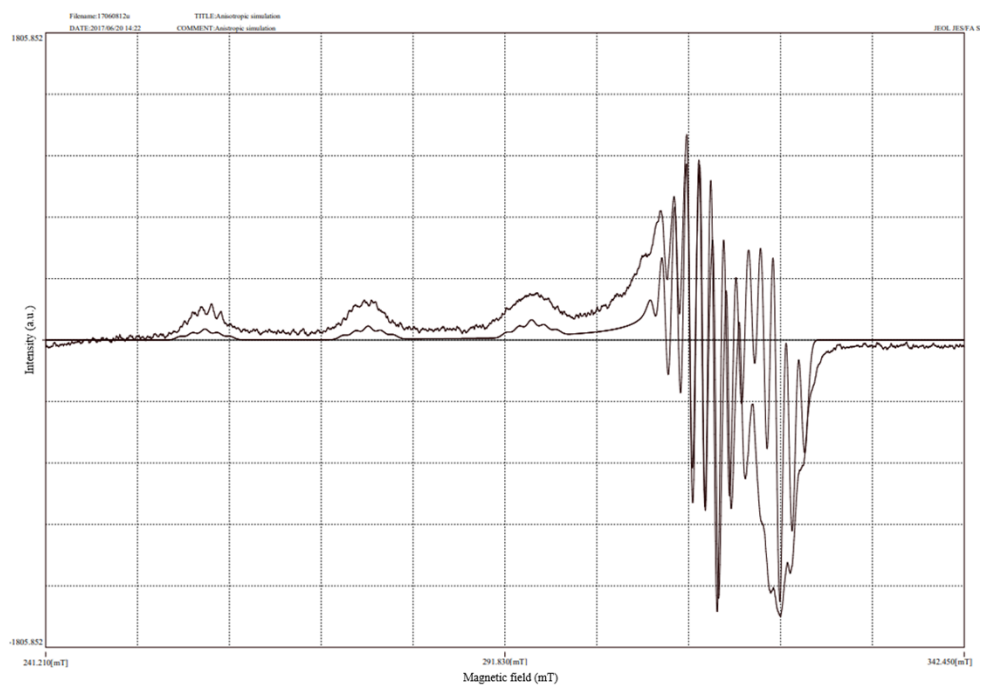

*Aqua(2,2'-bipyridine)(Indo)copper(II) nitrate (2a).*

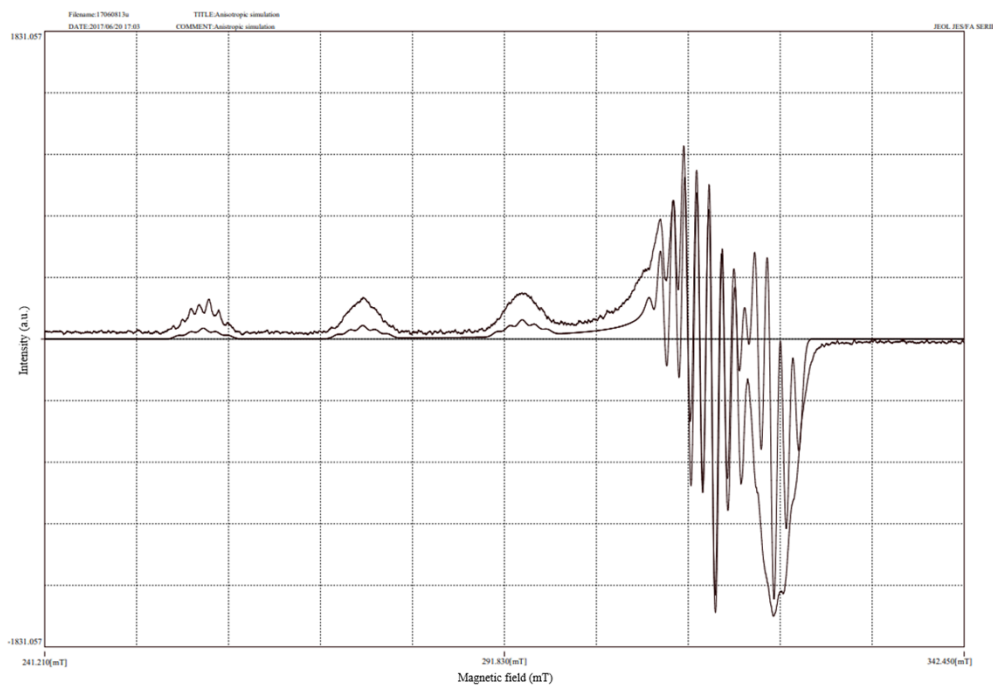

*Aqua(4,4'-dimethyl-2,2'-bipyridine)(Indo)copper(II) nitrate (2b).*

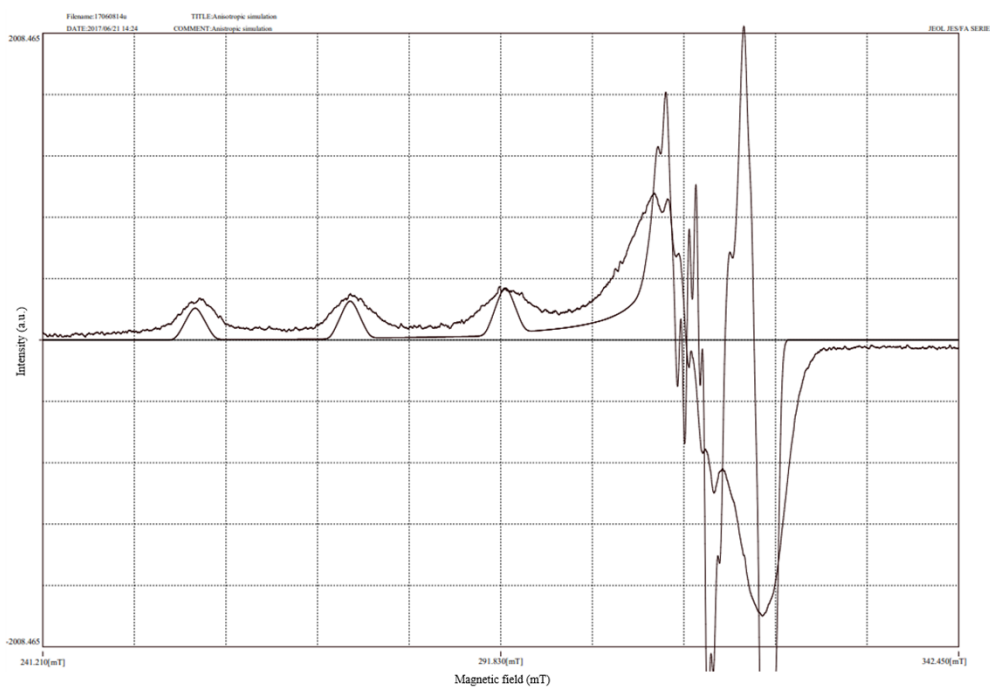

*Aqua(5,5'-dimethyl-2,2'-bipyridine)(Indo)copper(II) nitrate (2c).*

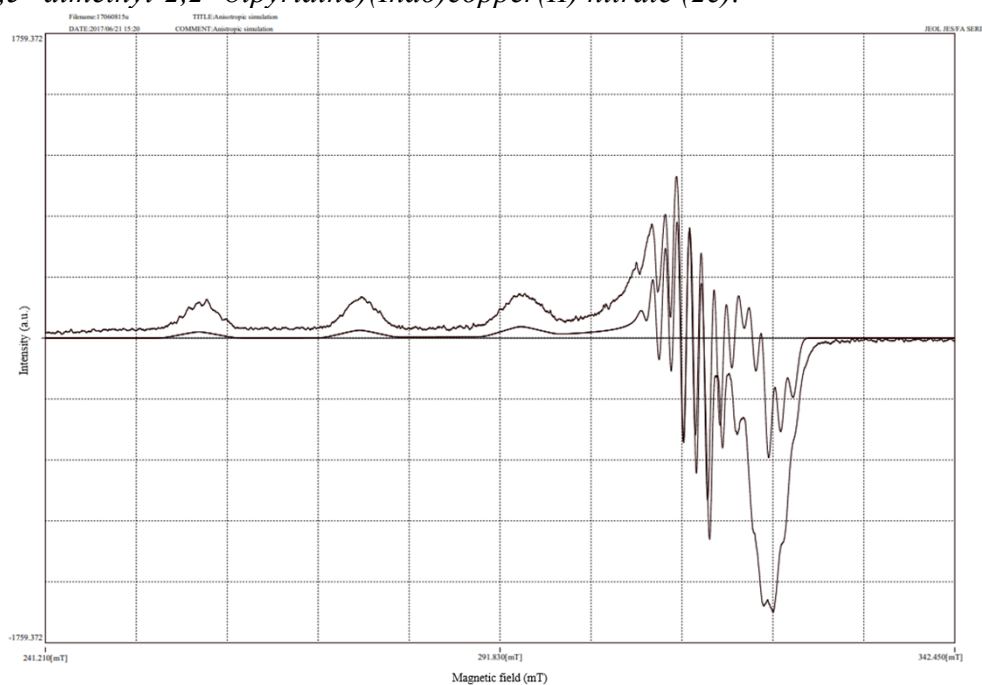

**Figure S3.** Experimental and simulated EPR spectra. 3 mmol/L MeOH solutions at 77 K.

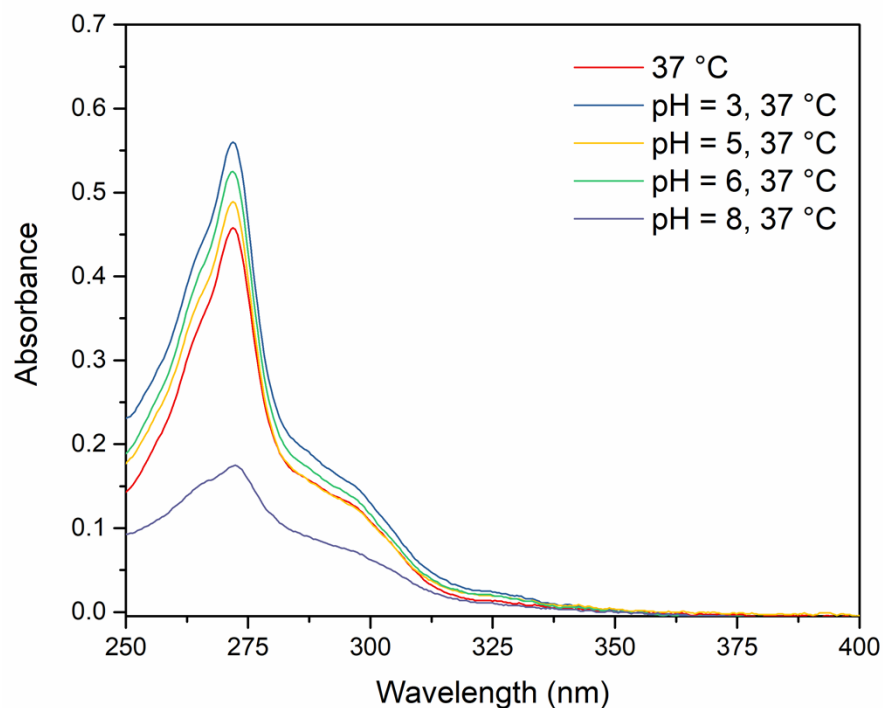

**Figure S4.** Electronic spectra at different pHs aqua(4,7-dimethyl-1,10-phenanthroline)(Indo)copper(II) nitrate (1b) at 37 °C using methanol solutions at 0.001 M.

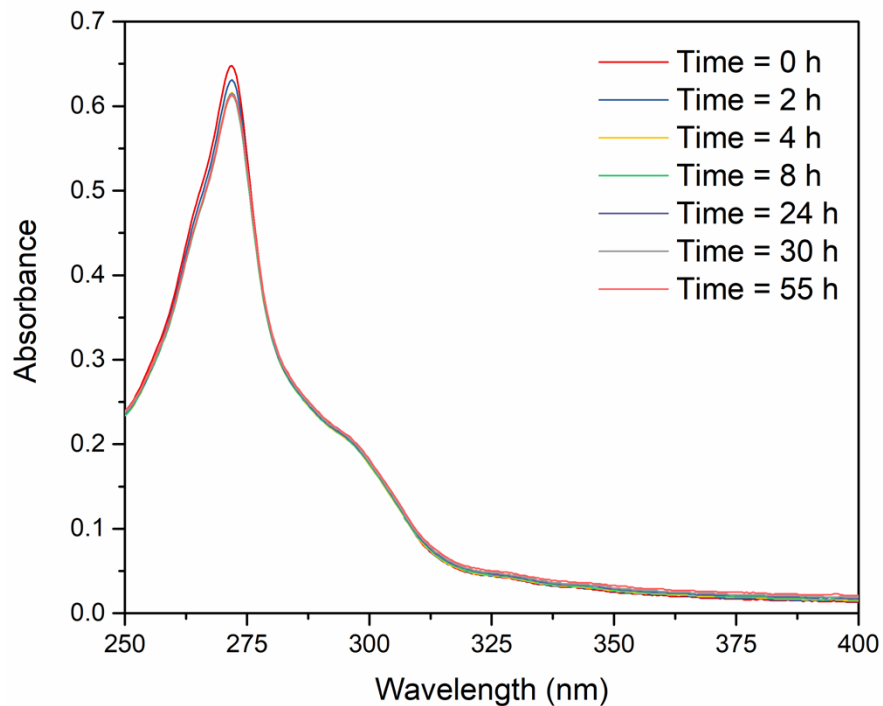

**Figure S5.** Electronic spectra at different times of aqua(4,7-dimethyl-1,10-phenanthroline)(Indo)copper(II) nitrate (1b) using methanol solutions at 0.001 M.

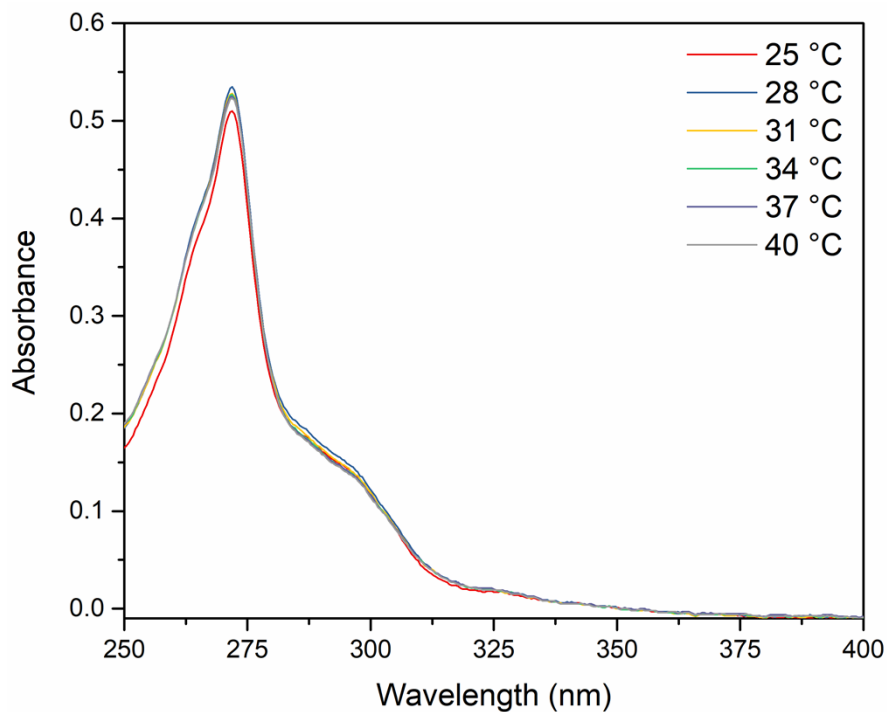

**Figure S6.** Electronic spectra at different temperatures of the compound aqua(4,7-dimethyl-1,10-phenanthroline)(Indo)copper(II) nitrate (1b) using methanol solutions at 0.001 M.

**Figure S7.** Optimized (M06/LanL2DZ) geometries, calculated  $V_M$  and  $E^0$  for [Cu(Indo)(N-N)] complexes.

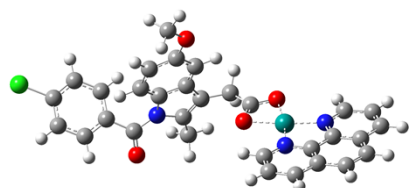

$$E^0 = -0.65 \text{ V} \quad V_M = 361.6 \text{ cm}^3/\text{mol}$$

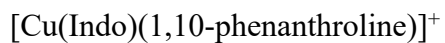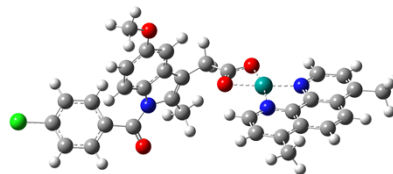

$$E^0_{calc} = -0.82 \text{ V} \quad V_M = 372.2 \text{ cm}^3/\text{mol}$$

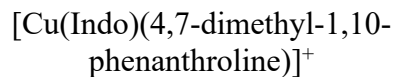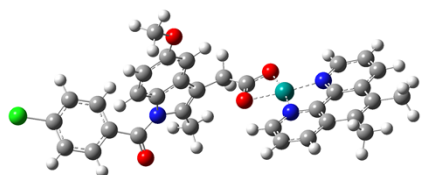

$$E^0_{calc} = -0.62 \text{ V} \quad V_M = 377.3 \text{ cm}^3/\text{mol}$$

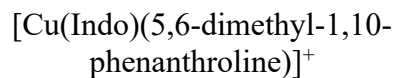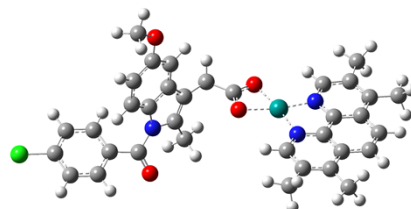

$$E^0_{calc} = -0.66 \text{ V} \quad V_M = 385.95 \text{ cm}^3/\text{mol}$$

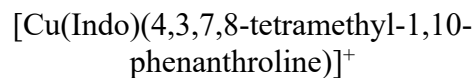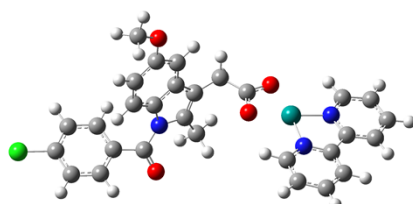

$$E^0_{calc} = -0.64 \text{ V} \quad V_M = 334.3 \text{ cm}^3/\text{mol}$$

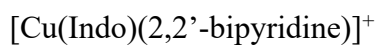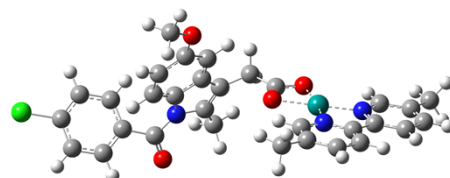

$$E^0_{calc} = -0.73 \text{ V} \quad V_M = 345.2 \text{ cm}^3/\text{mol}$$

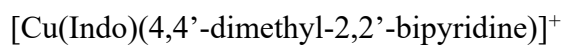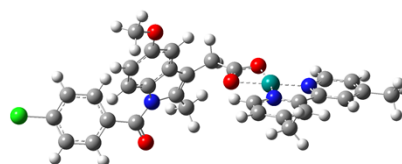

$$E^0_{calc} = -0.76 \text{ V} \quad V_M = 354.4 \text{ cm}^3/\text{mol}$$

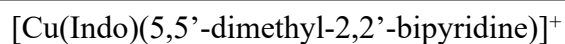

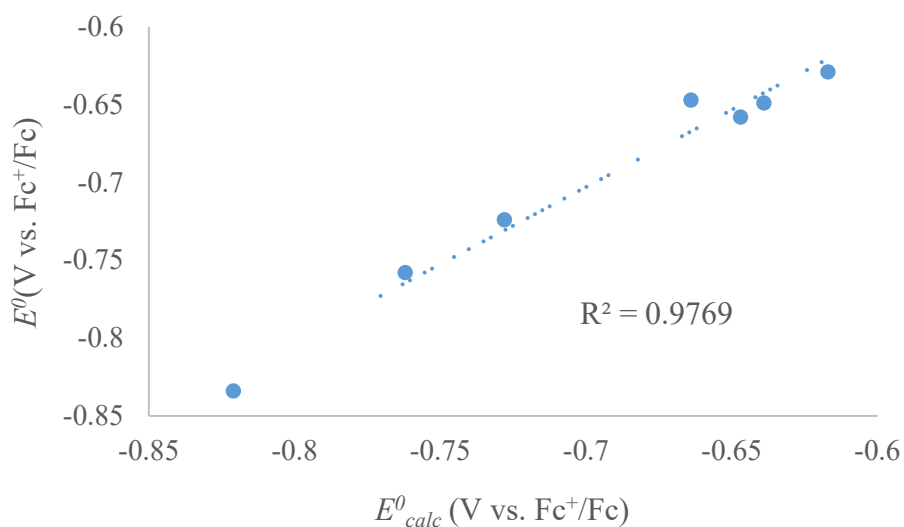

**Figure S8.** Plot of estimated and calculated redox potential

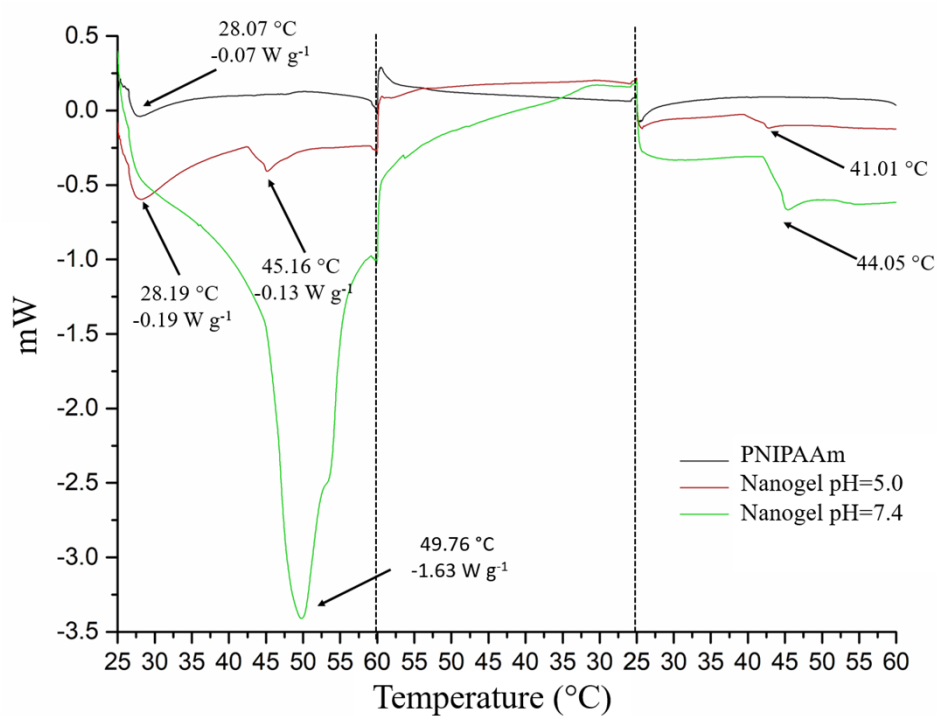

**Figure S9.** Differential calorimetry screening plot for PNIPAAm and nanogel (pH= 5.0 and 7.4)



**Table S2.** Encapsulation experiments data

| Test | Nanogel mass (mg) | Initial concentration (mg/mL) | Free concentration (mg/mL) | % Encapsulation | Mass complex/nanogel ratio |
|------|-------------------|-------------------------------|----------------------------|-----------------|----------------------------|
| A    | 20.2              | 1.425                         | 0.4437                     | 68.87           | 0.0486                     |
| B    | 19.9              | 1.425                         | 0.4537                     | 68.18           | 0.0488                     |
| C    | 19.9              | 1.425                         | 0.4143                     | 70.92           | 0.0508                     |
| D    | 20.0              | 1.425                         | 0.4150                     | 70.87           | 0.0505                     |
| E    | 19.8              | 1.425                         | 0.4601                     | 67.71           | 0.0487                     |
| F    | 19.8              | 1.425                         | 0.4236                     | 70.72           | 0.503                      |

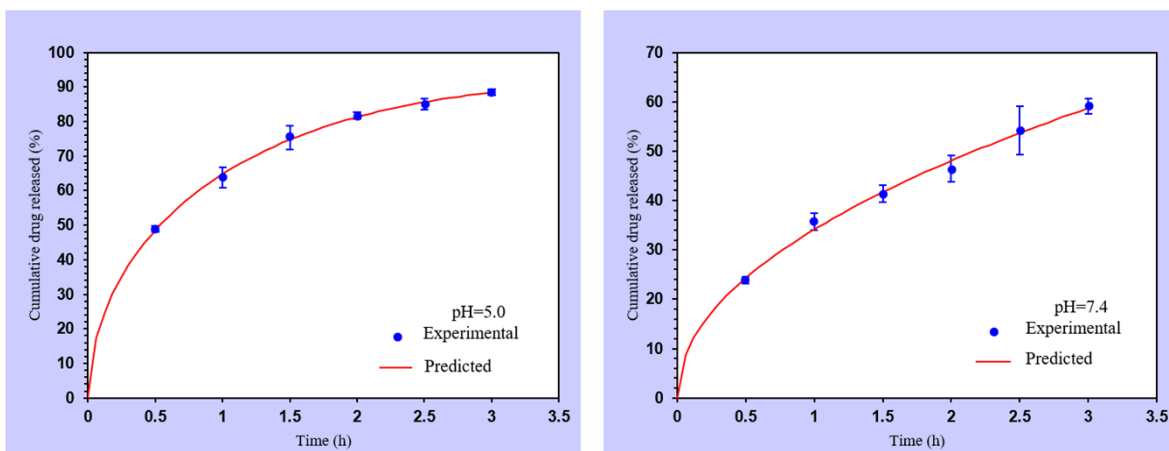

**Figure S10.** Release compound percentage and Peppas-Sahlin model adjustment
